# Supplementary material for: Immobilization of UiO-66-NH2 into Bacterial Cellulose Aerogels for Efficient Particulate Matter Filtration
Source: MDPI journal article supplement (doi:10.3390/su151813382), 2023-09-07
Supplement: s1 [file s1]

# Supporting information

*for*

## Immobilization of UiO-66-NH<sub>2</sub> into Bacterial Cellulose

### Aerogels for Efficient Particulate Matter Filtration

Qihang Dai <sup>1</sup>, Ju Liu <sup>1</sup>, Junjie Zheng <sup>2,\*</sup>, Fu Bo <sup>1,\*</sup>

<sup>1</sup> Jiangsu Co-Innovation Center of Efficient Processing and Utilization of Forest Resources, College of Chemical Engineering, Nanjing Forestry University, Nanjing 210037, China.

<sup>2</sup> Chemicals Testing Center of Nanjing University of Science and Technology, Nanjing 210094, China.

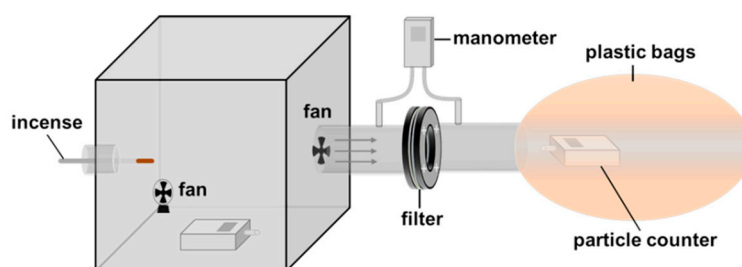

Figure S1. Illustration of the homemade setup for particulate matter filtration test.

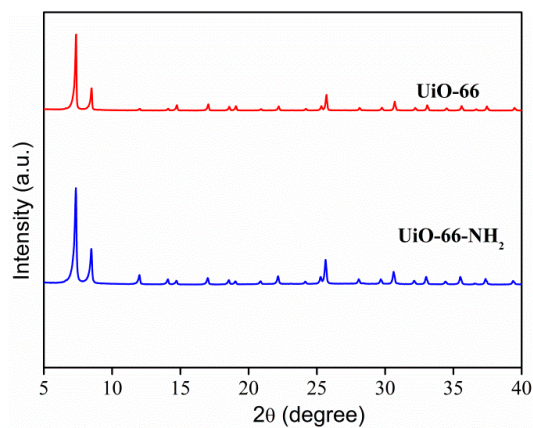

Figure S2. XRD patterns of powdery UiO-66 and UiO-66-NH<sub>2</sub> crystals.

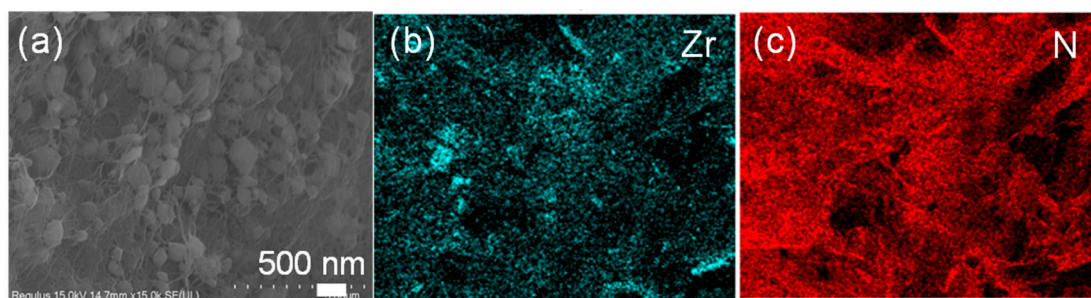

Figure S3. SEM image UiO-66-NH<sub>2</sub>@BC (a) and energy dispersive spectrometer mapping of Zr (b) and N (c) elements.

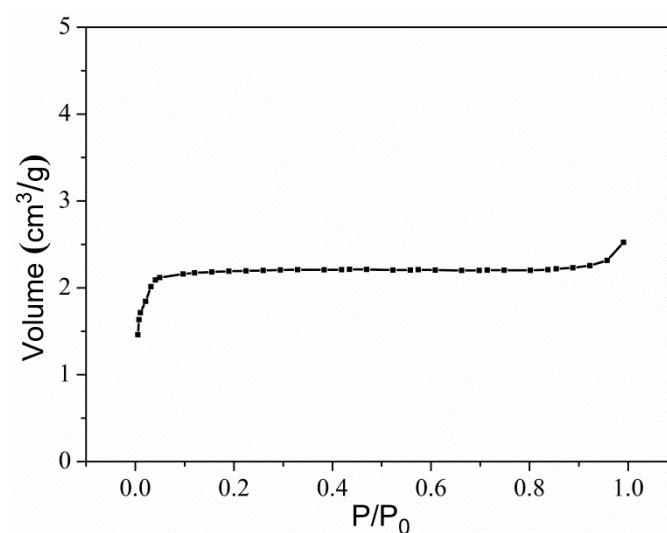

Figure S4. N<sub>2</sub> sorption isotherms of original BC aerogel.
