# Supplementary material for: Immobilization of UiO-66-NH2 into Bacterial Cellulose Aerogels for Efficient Particulate Matter Filtration
Source: MDPI journal article supplement (doi:10.3390/su151813382), 2023-09-07
Supplement: s1 [file s1]

Archive with 1 entries (1 files):
- sustainability-2571971-SI.pdf
